# Supplementary material
Source: publisher figshare collection journal article supplement (https://acs.figshare.com/ndownloader/files/9246829)
Supplement: Supplementary file 1 [file 9246829]

## Supporting Information

### **Activation of actuating hydrogels with WS<sub>2</sub> nanosheets for biomimetic cellular structures and steerable prompt deformation**

*Lu Zong<sup>†,‡</sup>, Mingjie Li<sup>†,\*</sup>, Jun You<sup>†</sup>, Xiaochen Wu<sup>†</sup> and Chaoxu Li<sup>†,‡,\*</sup>*

<sup>†</sup>CAS Key Laboratory of Bio-based materials, Qingdao Institute of Bioenergy and Bioprocess Technology, Chinese Academy of Sciences, Songling Road 189, Qingdao 266101, P. R. China

<sup>‡</sup>University of Chinese Academy of Sciences, 19A Yuquan Road, Beijing 100049, P. R. China

\*Corresponding authors: Mingjie Li (Email: [limj@qibebt.ac.cn](mailto:limj@qibebt.ac.cn)) and Chaoxu Li (Email: [licx@qibebt.ac.cn](mailto:licx@qibebt.ac.cn)).

## **Table of contents in Supporting Information:**

### ***Supporting figures***

*Figure S1-Figure S16*

### ***Supporting videos***

*Video S1-Video S12*

## Supporting figures

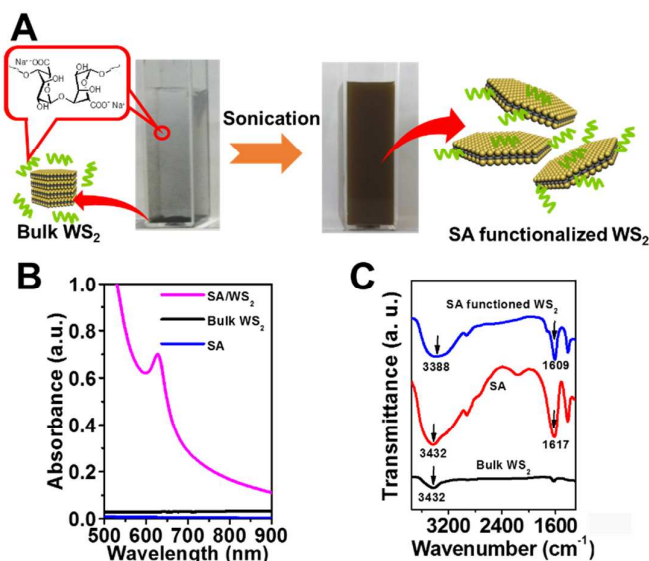

**Figure S1.** (A) Schematic illustration of alginate-mediated aqueous ultrasonic exfoliation of WS<sub>2</sub> nanosheets. (B) UV-vis absorption spectra of exfoliated WS<sub>2</sub> nanosheets in water. (C) Fourier transform infrared (FTIR) spectra of bulk WS<sub>2</sub>, alginate and alginate-exfoliated WS<sub>2</sub> nanosheets. SA: sodium alginate. FTIR spectra were collected using a Thermo Fisher Nicolet 6700 FTIR Spectrometer. UV-vis spectra were taken by a UV-vis-NIR spectrophotometer (PerkinElmer Lambda 25).

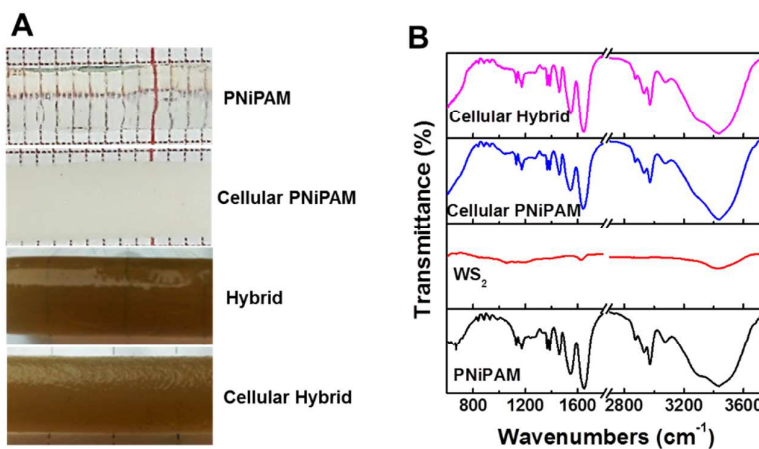

**Figure S2.** (A) Optical images of as-prepared hydrogels. (B) FTIR of as-prepared hydrogels and WS<sub>2</sub> nanosheets.

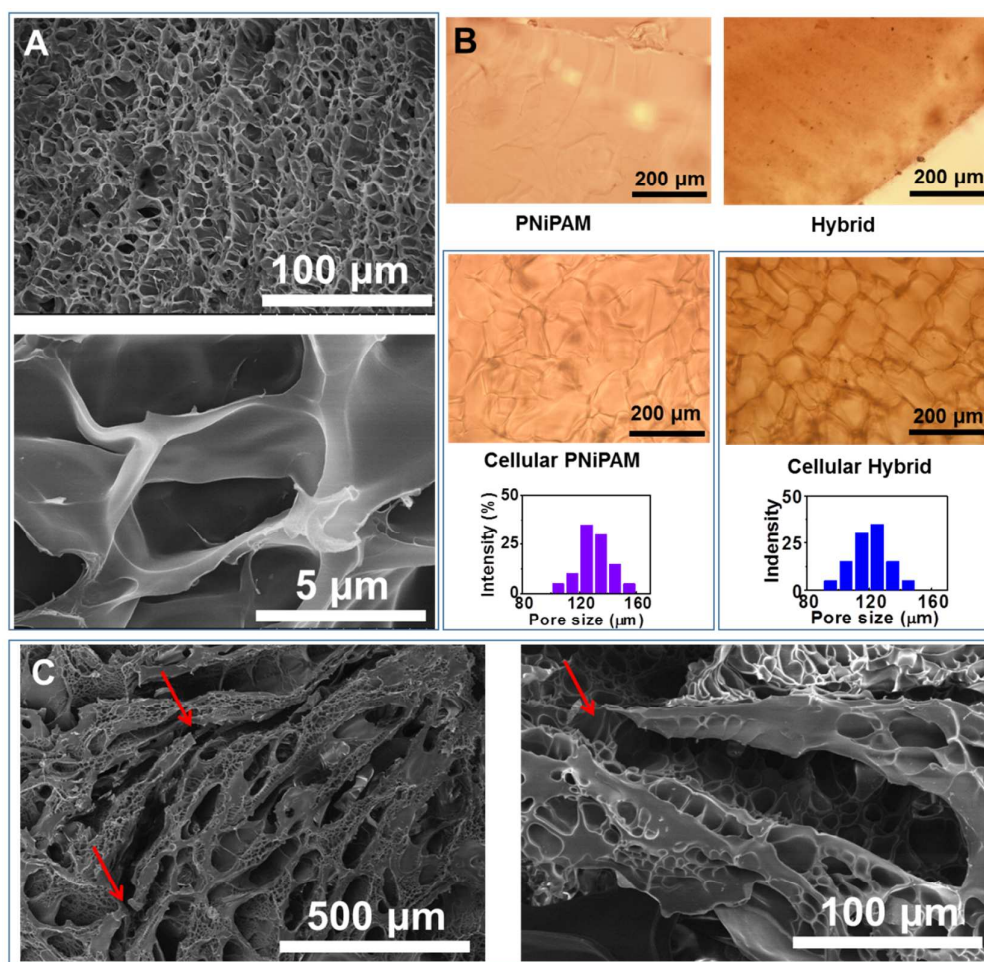

**Figure S3.** (A) SEM images of freezing-dried *PNiPAM* hydrogel. (B) Optical microscopy images and pore histograms of as-prepared hydrogels. (C) Effect of reverse sequence of freezing and polymerization on microstructures of hybrid hydrogels. The hybrid hydrogel was synthesized by polymerization at 0  $^{\circ}\text{C}$  for 24 h and then freezing at  $-24$   $^{\circ}\text{C}$  for 24 h. Except the reverse sequence of freezing and polymerization, other specific experimental parameters are the same with those for production of *Cellular Hybrid* hydrogel. Apparently, ice-crystallization within the polymerized *PNiPAM* matrix resulted in inhomogeneous porous structures and local structural fracture.

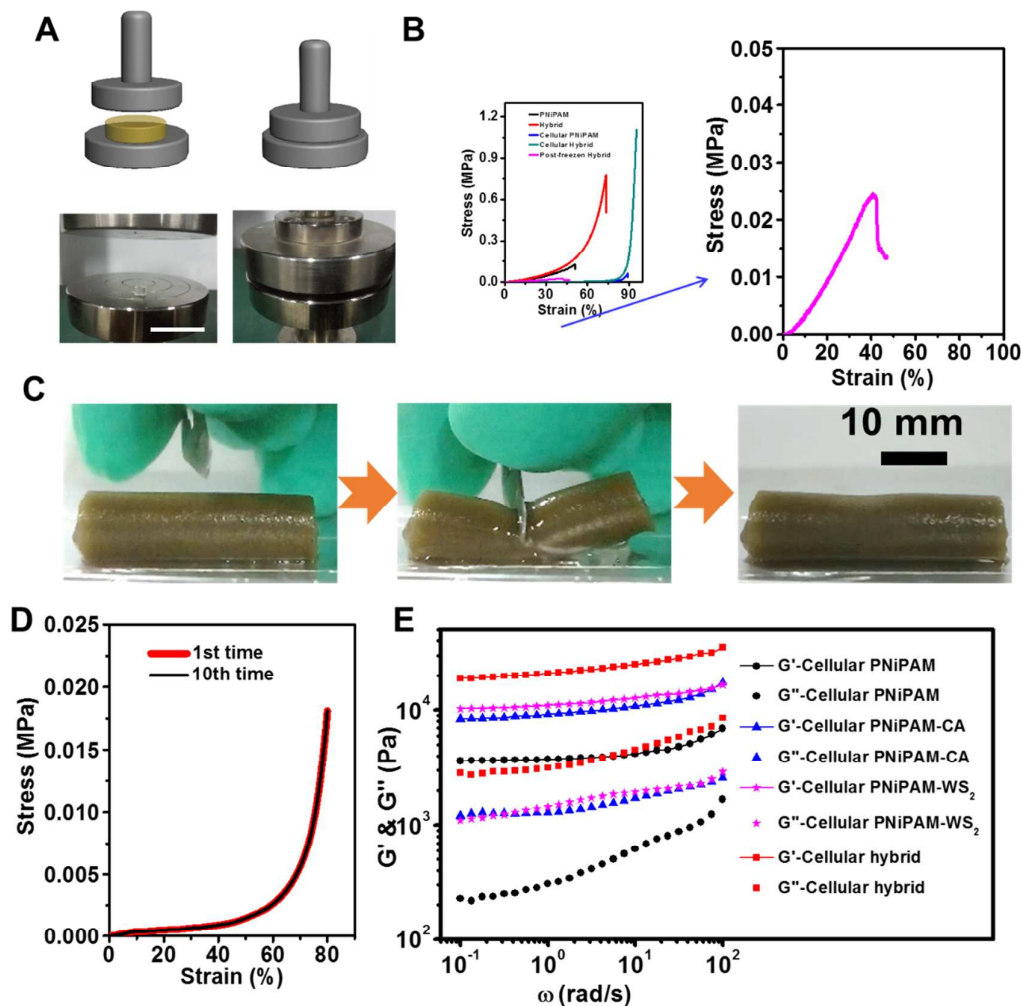

**Figure S4.** (A) Scheme and optical images showing compression test of cylinder hydrogel. The scale bar is 5 cm. (B) Compression curves of as-prepared hydrogels. *Post-frozen Hybrid* was produced by the reverse sequence of freezing and polymerization (i.e. freezing after polymerization) with with WS<sub>2</sub> nanosheets. (C) Optical images showed that *Cellular Hybrid* hydrogel could withstand sharp scalpel. Scale bar 10 mm. (D) 1st and 10th compression test of *Cellular Hybrid* hydrogel. (E) Mechanical rheological characteristics of as-prepared hydrogels.  $G'$  is storage modulus while  $G''$  refers to loss modulus. *Cellular PNiPAM*, *Cellular PNiPAM-CA* and *Cellular PNiPAM-WS<sub>2</sub>* refer to PNiPAM crosslinked with BIS, BIS + CA and BIS + alginate-modified WS<sub>2</sub>, respectively. *Cellular Hybrid* hydrogel displays a dominant elastic solid behavior with  $G' > G''$ , and in spite of the crosslinking from BIS to form solid hydrogel, the contribution from CA crosslinking is much higher

than that of alginate-modified WS<sub>2</sub>. Rheological measurements were performed on a MCR 301 rheometer (Anton Paar) equipped with parallel plate grippers of 25 mm in diameter. Oscillatory frequency sweep testing was performed at constant 1% strain (Test temperature: 4 °C).

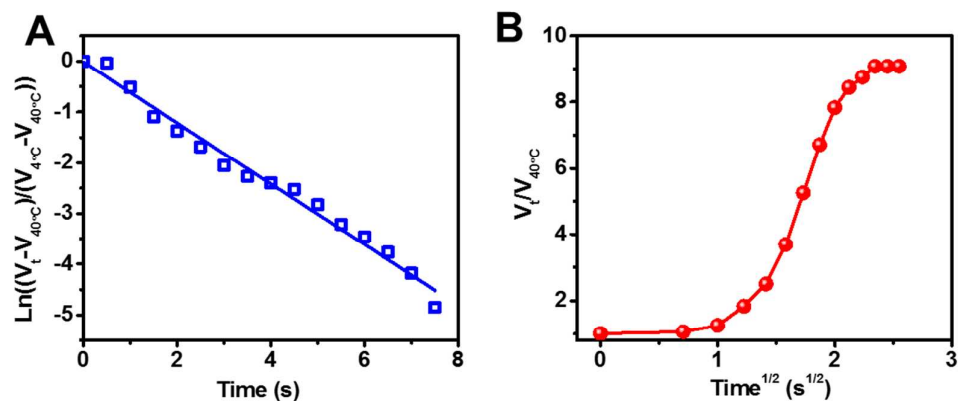

**Figure S5.** (A)  $\ln[(V_t - V_s)/(V_0 - V_s)]$  versus time  $t$  for shrinkage of *Cellular Hybrid* hydrogel at 40 °C. (B) Swelling kinetics of *Cellular Hybrid* hydrogel at 4 °C. *Cellular Hybrid* hydrogel showed typical sigmoidal patterns indicating that water could permeate within hydrogel easily, thereby endowing fast shrinkage and recovery rates.

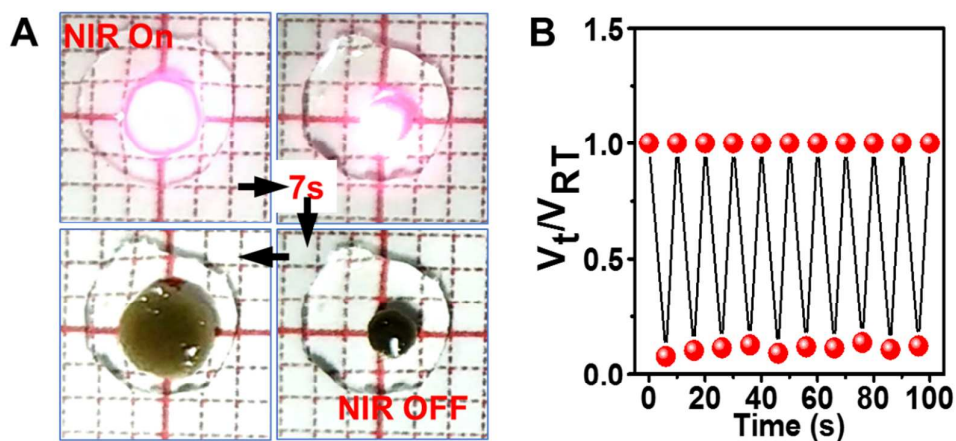

**Figure S6.** (A) Optical image of shrinkage-recovery cycle of *Cellular Hybrid* hydrogel under NIR radiation (6 W cm<sup>-2</sup>) at RT. Scale bar of coordinate paper is 2 mm. (B) Repeatability of shrinkage-recovery cycles of *Cellular Hybrid* hydrogel under periodic on-off NIR radiation.

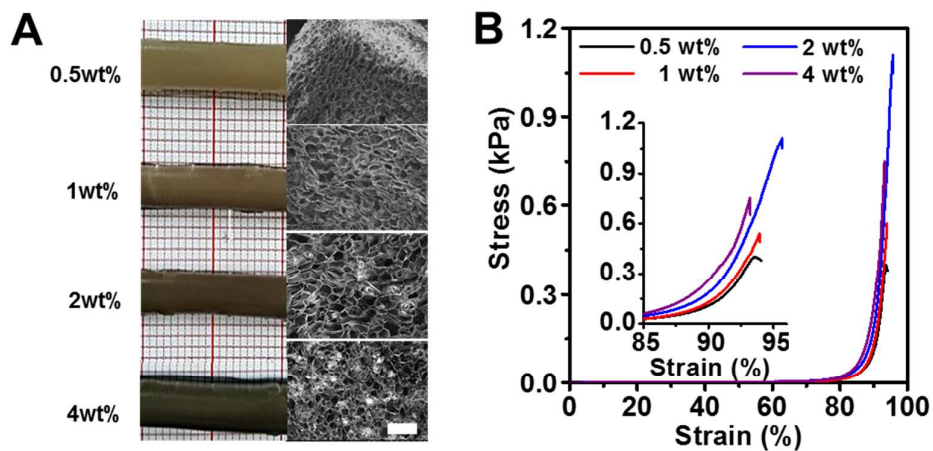

**Figure S7.** (A) Optical images and corresponding porous microstructures of *Cellular Hybrid* hydrogels with different WS<sub>2</sub> concentrations: 0.5, 1, 2 and 4 wt%. Scale bar of coordinate paper is 2 mm. Scale bar in SEM images is 250  $\mu$ m. (B) Compression tests of *Cellular Hybrid* hydrogels with different WS<sub>2</sub> concentrations.

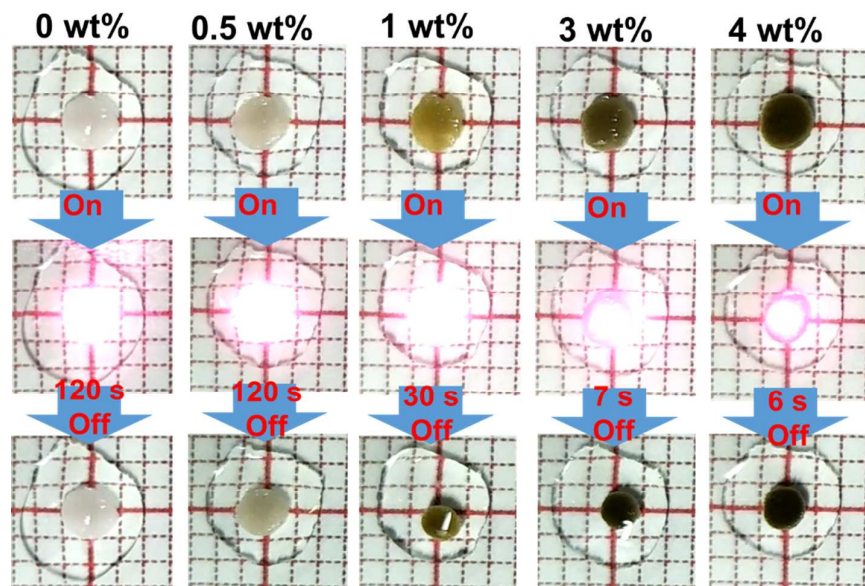

**Figure S8.** Optical image of shrinking processes of *Cellular Hybrid* hydrogels with different WS<sub>2</sub> concentrations under NIR radiation (6 W cm<sup>-2</sup>) at RT. Scale bar of coordinate paper is 2 mm.

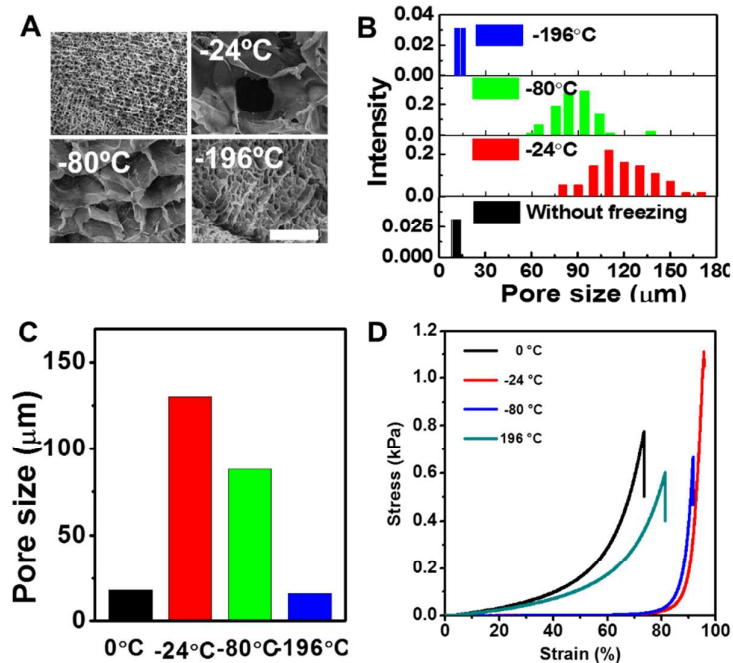

**Figure S9.** Physical characterization of *Cellular Hybrid* hydrogels prepared at different pre-freezing temperatures: 0, -24, -80 and -196 °C. Scale bar 100 μm. (A) Porous microstructures. (B) Pore histograms. (C) Average pore sizes. (D) Compression tests.

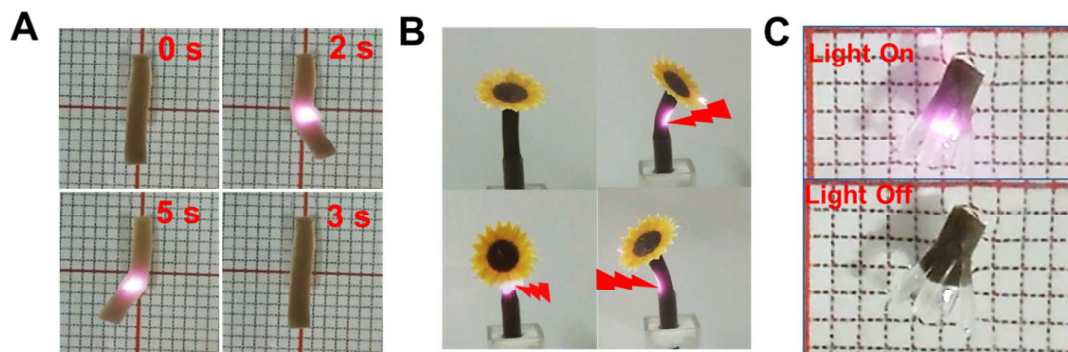

**Figure S10.** (A) NIR radiation driven actuation behavior of *Cellular Hybrid* hydrogel. Scale bar of coordinate paper is 2 mm. (B) Biomimetic apricus sunflower produced with *Cellular Hybrid* hydrogel. NIR light ( $0.5 \text{ W cm}^{-2}$ ). Scale bar 10 mm. (C) Optical images of aquatic swimmer driven by NIR ( $8 \text{ W cm}^{-2}$ ). Scale bar of coordinate paper is 2 mm.

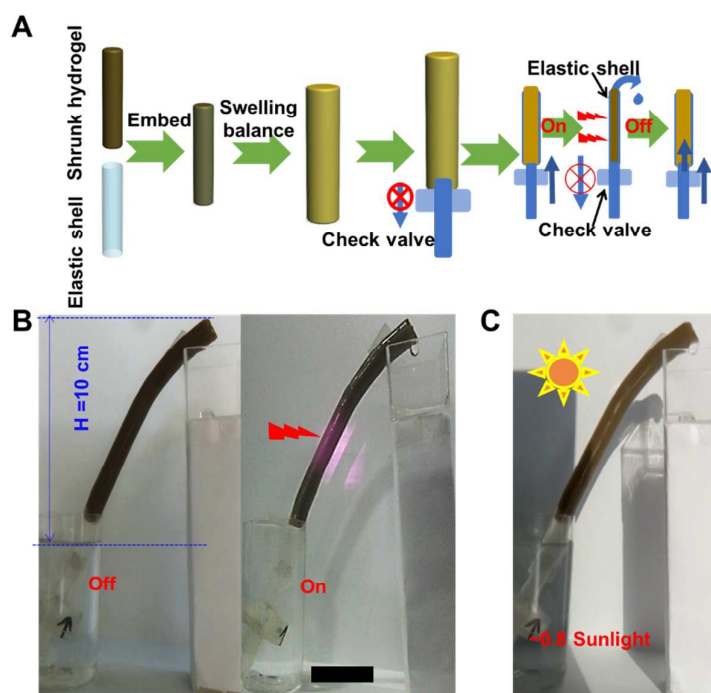

**Figure S11.** (A) Illustration of construction process of water-lifting filter. (B & C) Optical images of water-lifting process driven by NIR radiation ( $0.11 \text{ W cm}^{-2}$ ) (B) and equivalent sunlight light (power density  $\sim 0.8$  sunlight) (C). The scale bar is 20 mm.

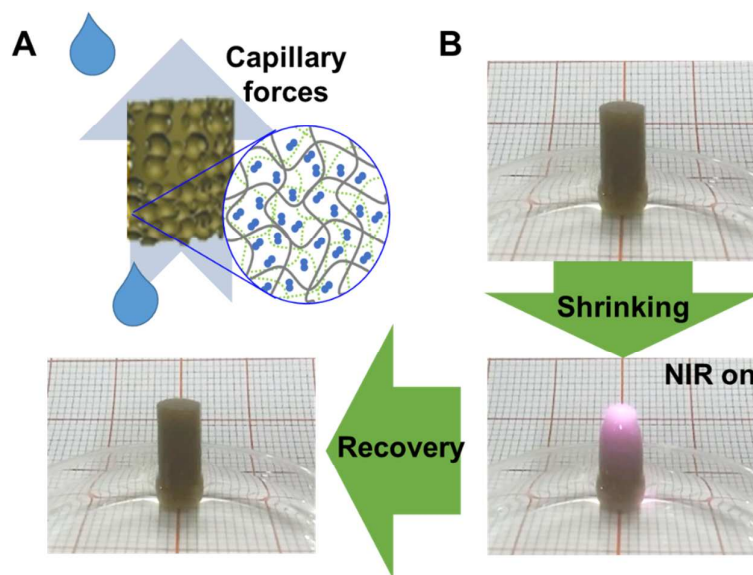

**Figure S12.** Schematic illustration (A) and optical images (B) of capillary-based water uptake properties of *Cellular Hybrid* hydrogel. Scale bar of coordinate paper is 2 mm.

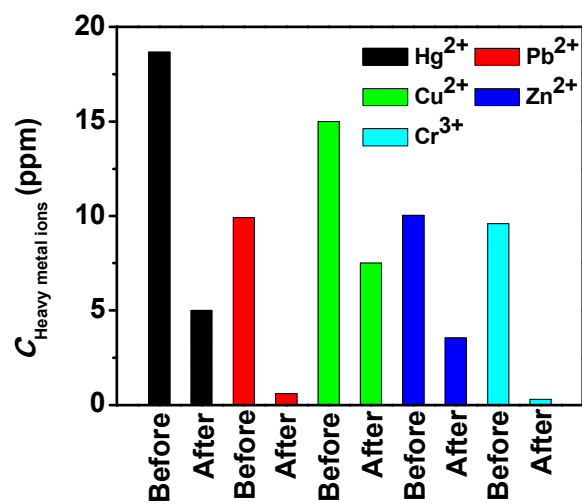

**Figure S13.** Purification capability of water-lifting filter towards different metal ions.

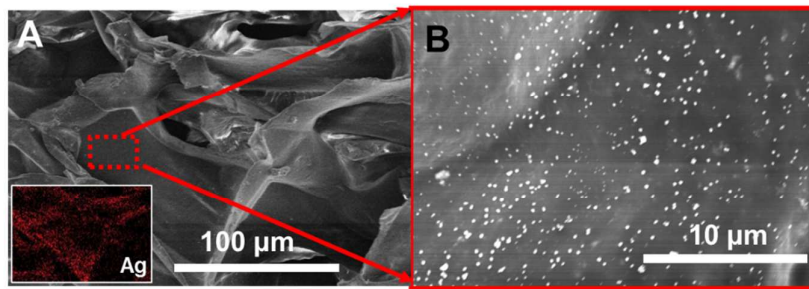

**Figure S14.** (A & B) SEM images of *Cellular Hybrid* hydrogel embedding with Ag nanoparticles (A) and zoom-in region (B). The inset in (A) is element mapping of Ag.

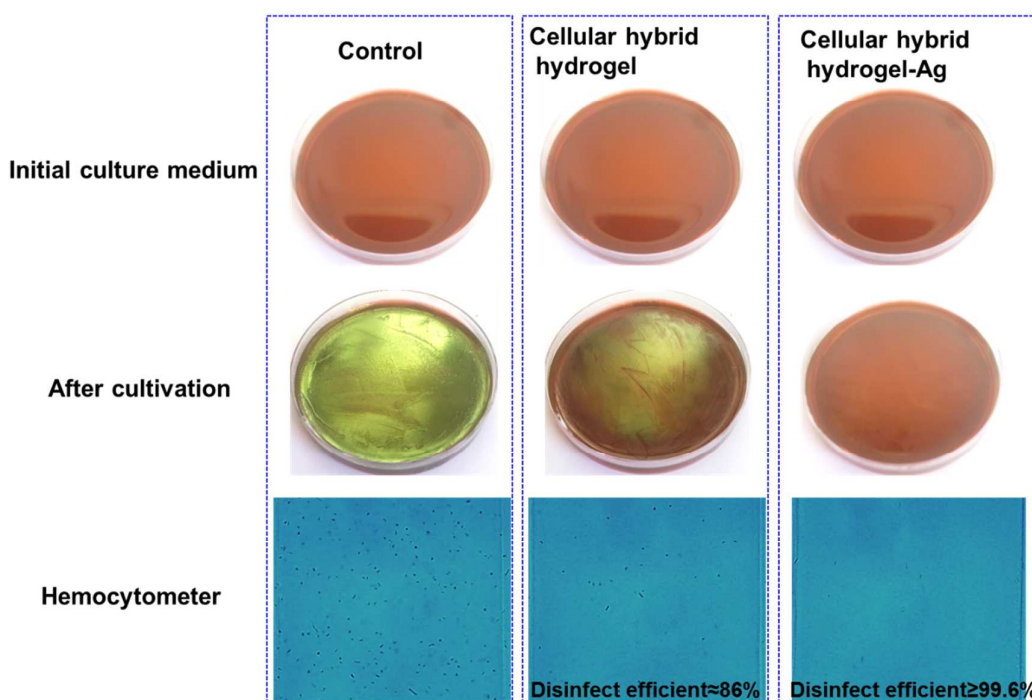

**Figure S15.** Optical images of eosin-methylene blue medium which was cultured before and after filtered water (containing *E. coli*). Bottom is microphotograph of hemocytometer of re-cultured water containing *E. coli* (diluted times = 100 for a better observed). The disinfect efficiency were also given.

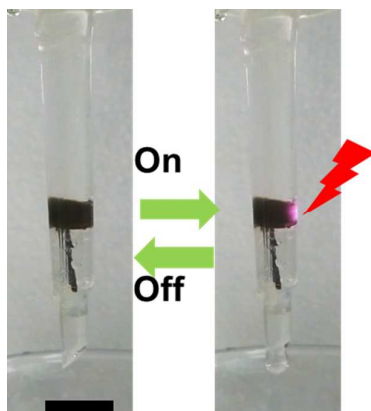

**Figure S16.** Optical images of light-controlled hydrogel microvalve. Scale bar is 10 mm.

## Supporting Videos:

**Video S1.** Super mechanical properties of *Cellular Hybrid* hydrogel.

**Video S2.** Rapid volumetric variation of *Cellular Hybrid* hydrogel at 4 °C and 40 °C.

**Video S3.** Rapid volumetric variation of *Cellular Hybrid* hydrogel exposed to 6 W cm<sup>-2</sup> NIR radiation and equivalent ~0.8 sunlight at room temperature.

**Video S4.** Lacking photo-responsiveness of *Cellular PNiPAM* hydrogel under 6 W cm<sup>-2</sup> NIR radiation.

**Video S5.** Actuating behavior of *Cellular Hybrid* hydrogel in water under NIR radiation (808 nm, 8 W cm<sup>-2</sup>) at room temperature.

**Video S6.** Biomimetic apricus sunflower produced with *Cellular Hybrid* hydrogel under NIR radiation (808 nm, 0.5 W cm<sup>-2</sup>) at room temperature.

**Video S7.** Moving aquatic swimmer under NIR radiation (808 nm, 8 W cm<sup>-2</sup>) at room temperature.

**Video S8.** Moving rotator on watery surface under NIR radiation (808 nm, 2 W cm<sup>-2</sup>) at room temperature.

**Video S9.** Water-lifering behavior of water-lifting filter under NIR radiation (808 nm, 0.11 W cm<sup>-2</sup>).

**Video S10.** Capillary driven water-lifting and water release under NIR radiation (808 nm, 0.11 W cm<sup>-2</sup>).

**Video S11.** Water-lifering behavior of water-lifting filter under equivalent sunlight (~ 0.8 sunlight).

**Video S12.** Liquid-microvalve controlled by NIR radiation (808 nm, 1.25 W cm<sup>-2</sup>).
